# Supplementary material
Source: ML conference proceedings conference paper supplement (https://openreview.net/forum?id=X0rpsv88au)

# Best-of-N Improves Hit Probability (Analytic)

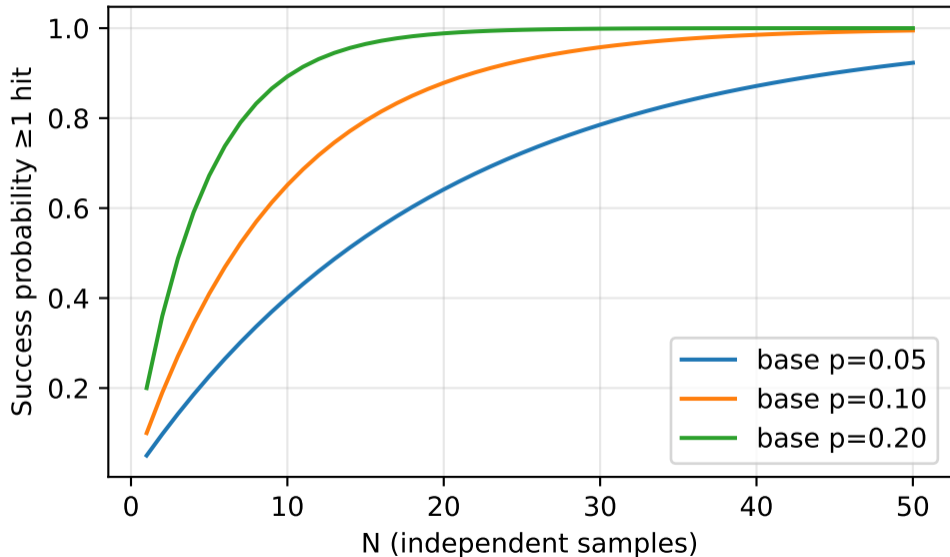

Supplement: supplementary_material [file best_of_n_success.pdf › supplemental_material/drawings/best_of_n_success.pdf]

Energy per Hit Lower Bound:  $E/p$  (Illustrative)

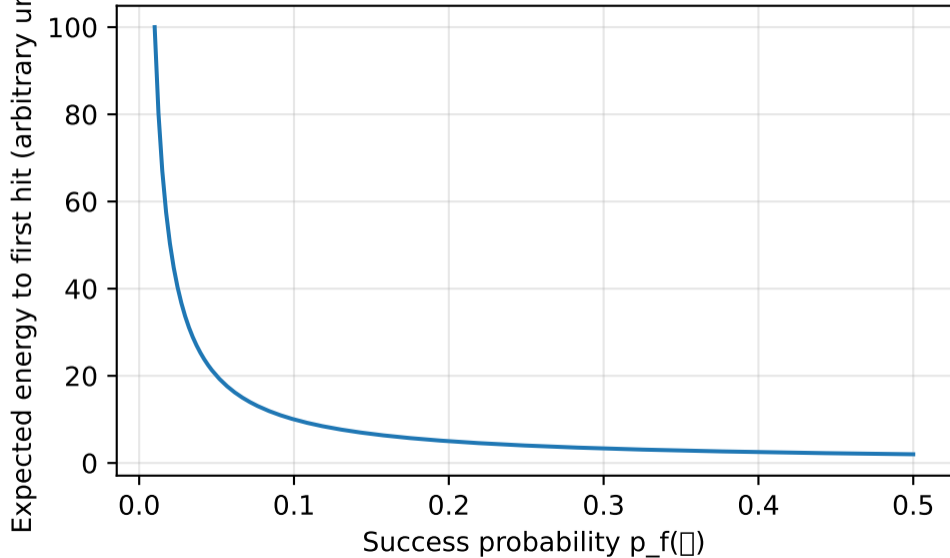

Supplement: supplementary_material [file energy_per_hit.pdf › supplemental_material/drawings/energy_per_hit.pdf]

Operator Effect on Conditional Entropy (Illustrative)

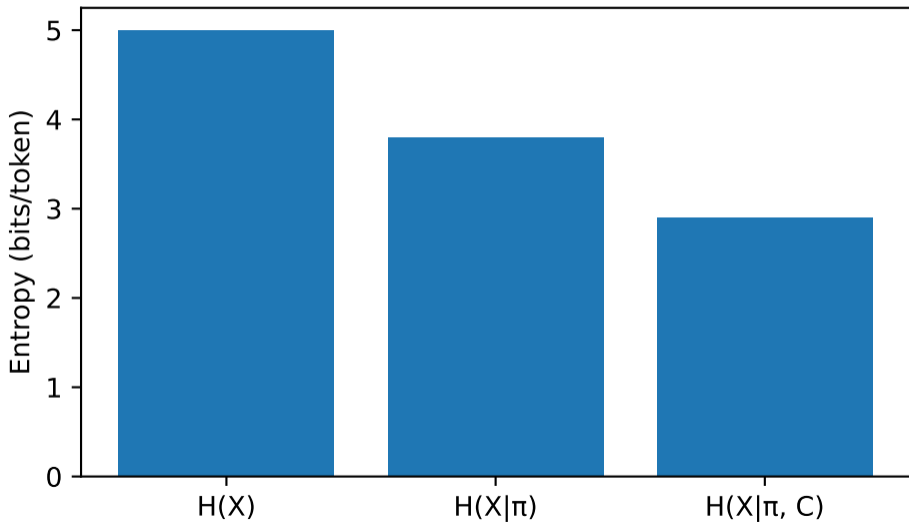

Supplement: supplementary_material [file entropy_reduction.pdf › supplemental_material/drawings/entropy_reduction.pdf]

# Hallucination Risk Decomposition (Illustrative)

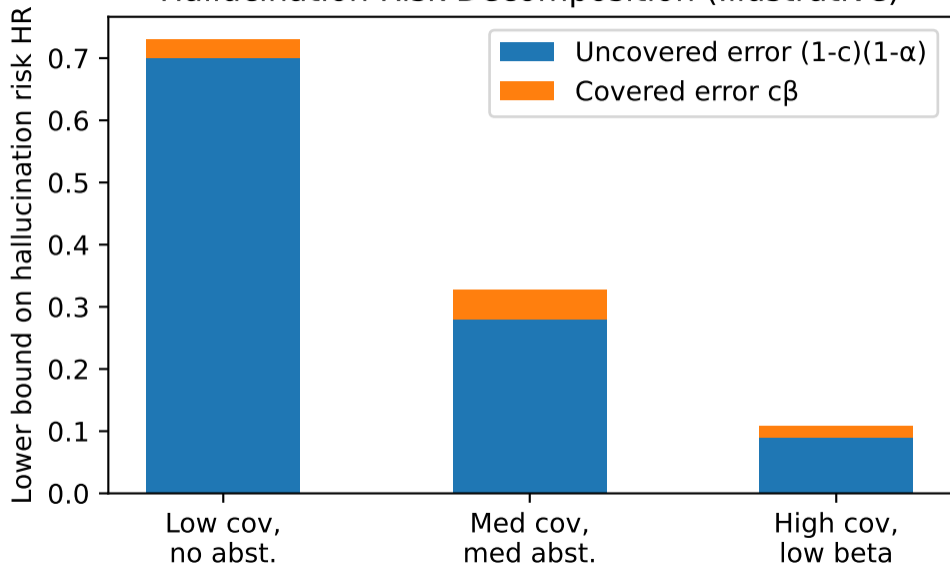

Supplement: supplementary_material [file hallucination_decomposition.pdf › supplemental_material/drawings/hallucination_decomposition.pdf]

Greedy Retrieval Approaches Near-Optimal Utility (Illustrat

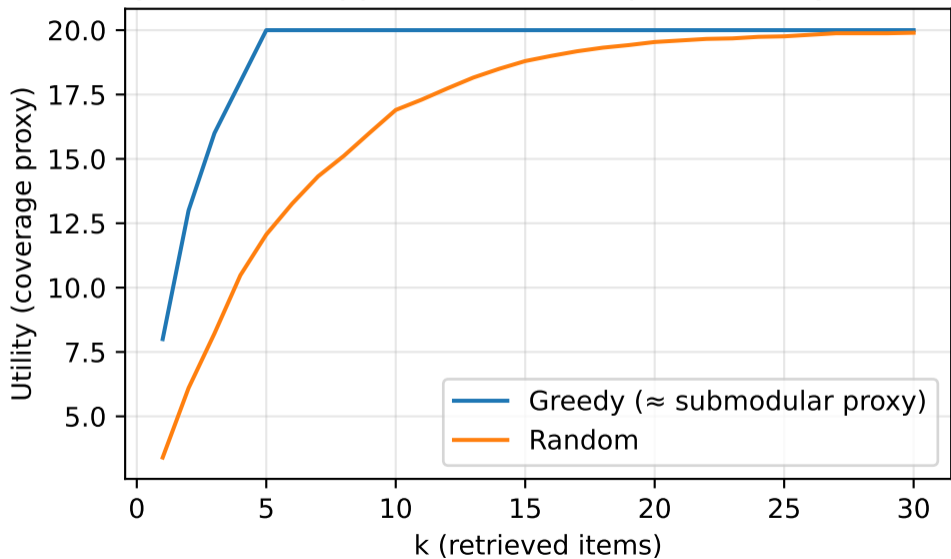

Supplement: supplementary_material [file submodular_greedy_gain.pdf › supplemental_material/drawings/submodular_greedy_gain.pdf]
